# Supplementary material for: Dimerisation of APOBEC1 is dispensable for its RNA/DNA editing activity and modulates its availability
Source: bioRxiv or medRxiv preprint supplement (doi:10.1101/410803), 2021-02-25
Supplement: Supplementary file [file 410803-1.pdf]

## Supplementary Figure 1

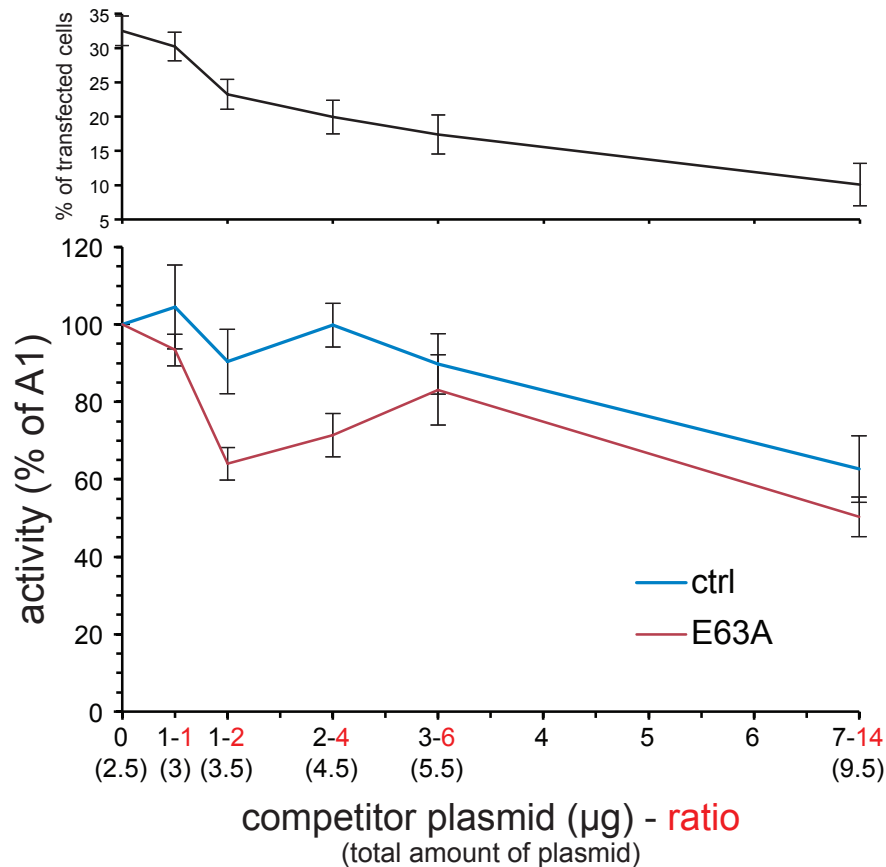

### Linearity of APOBEC1 activity with increasing amount of plasmid DNA

RNA editing of rat APOBEC1 in HEK293T cells transiently cotransfected with plasmids encoding for the mCherry-ApoB-EGFP reporter (1 µg), rat APOBEC1 (0.5 µg), A1CF (1 µg), and increasing amounts of either a control plasmid (ctrl) or a catalytically inactive APOBEC1 mutant (E63A). The upper panel shows the transfection efficiency (mCherry(+)) cells for each point. The lower panel shows the APOBEC1-dependent RNA editing of the reporter (percentage of gated cells) normalised to the activity of APOBEC1 in absence of competitor DNA. The ratio of the competitor DNA with APOBEC1 is shown in red, and the amount of total DNA used in the transfection is shown in parentheses. The error bars represent the standard deviation from three experiments.

## Supplementary Figure 2

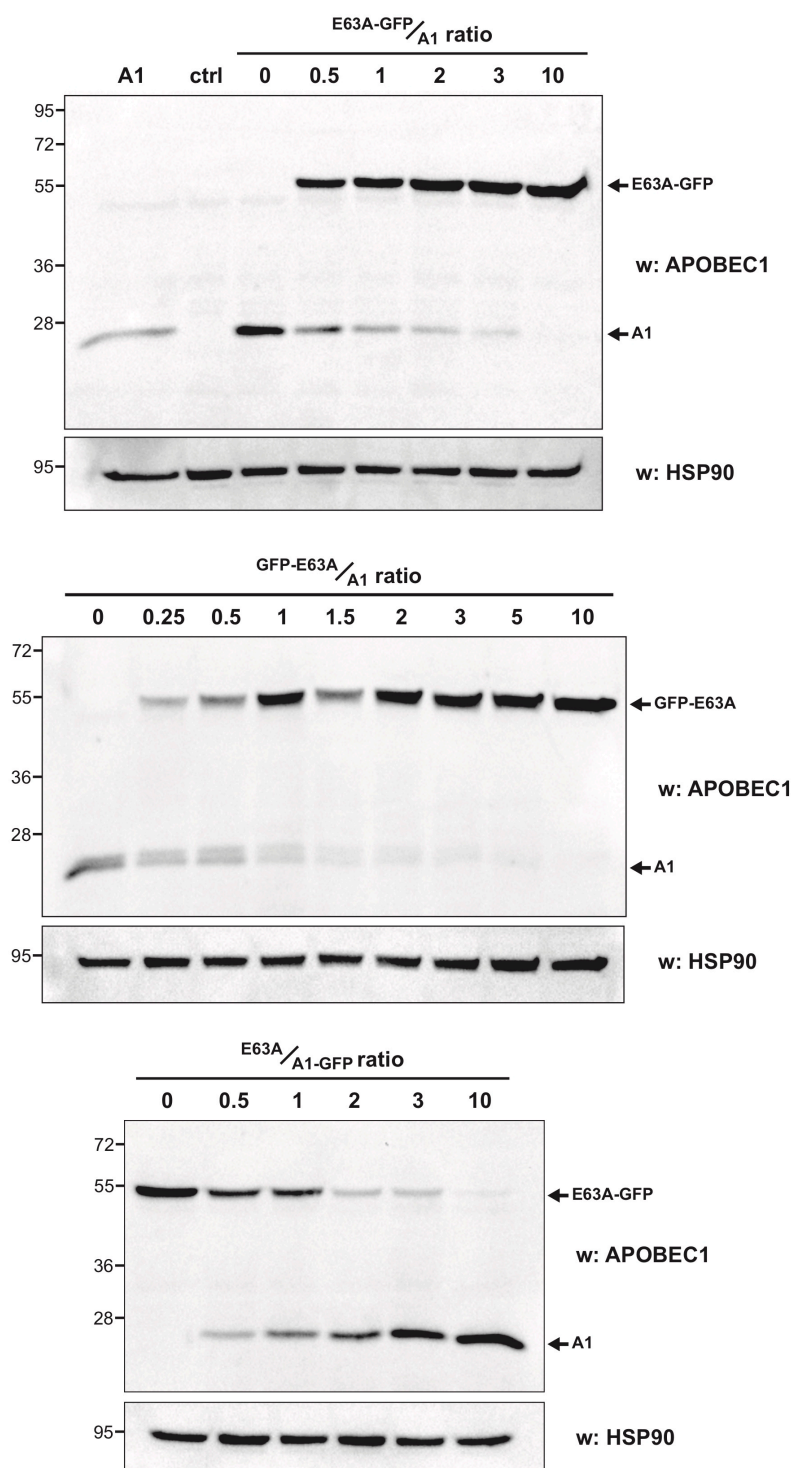

### Coexpression of different ratios of APOBEC1 constructs

Representative western blots showing the expression levels various combinations of APOBEC1 constructs in transiently transfected HEK293T cells. 2  $\mu$ g of total plasmid DNA were transfected in cells using the ratios indicated on the blots. There is not representative blot for GFP-A1/A1-GFP cotransfections, as the identical molecular weight does not allow their discrimination.

Supplementary Figure 3

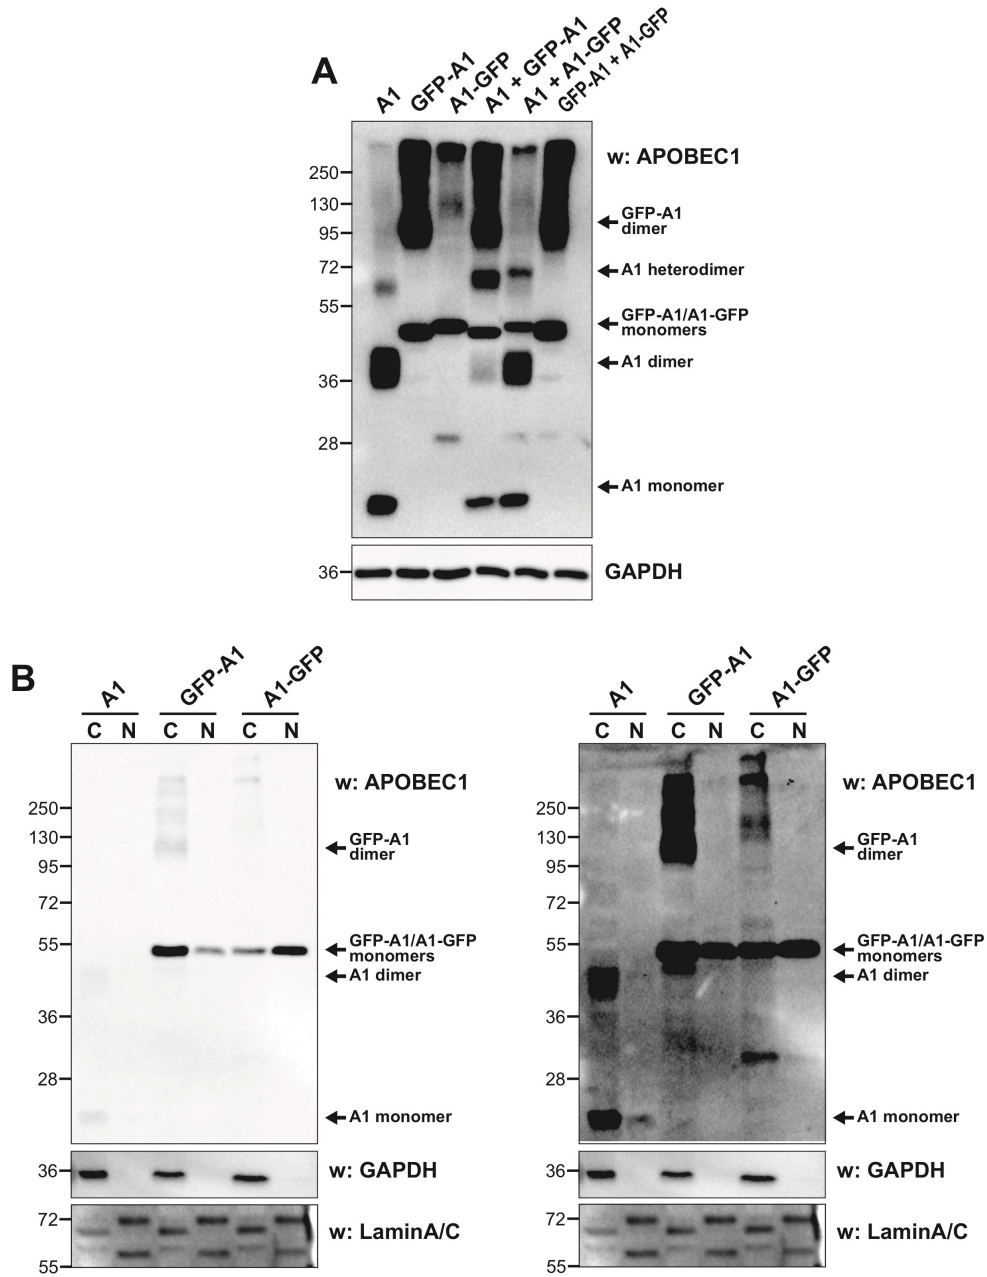

Different exposures of the crosslinking experiments shown in Figure 3B and 3C
